# Supplementary figures and images for: Discovery of Lipid Metabolism-Related Genes for Predicting Tumor Immune Microenvironment Status and Prognosis in Prostate Cancer
Source: Hindawi journal article supplement (doi:10.1155/2022/8227806), 2022-09-05

A

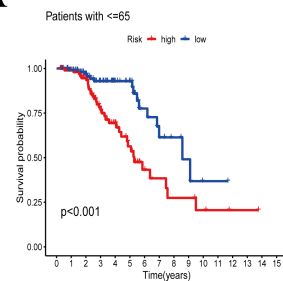

B

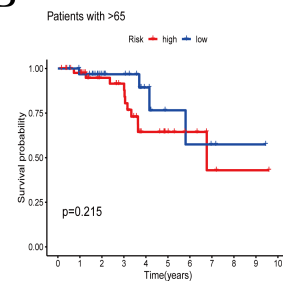

C

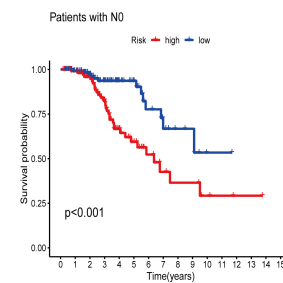

D

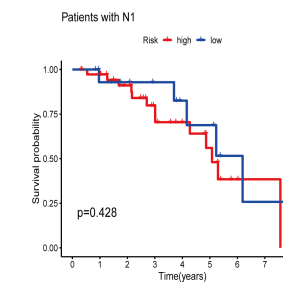

E

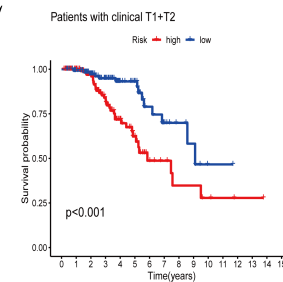

F

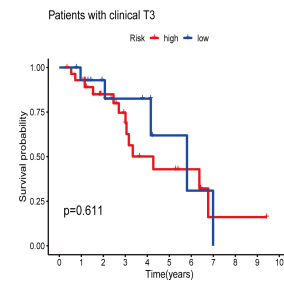

G

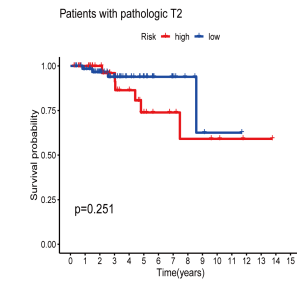

H

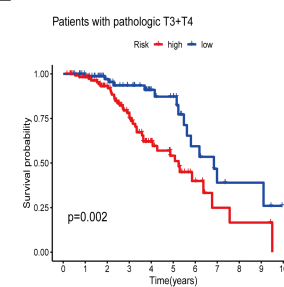

Supplement: f1 [file 8227806.f1.zip]

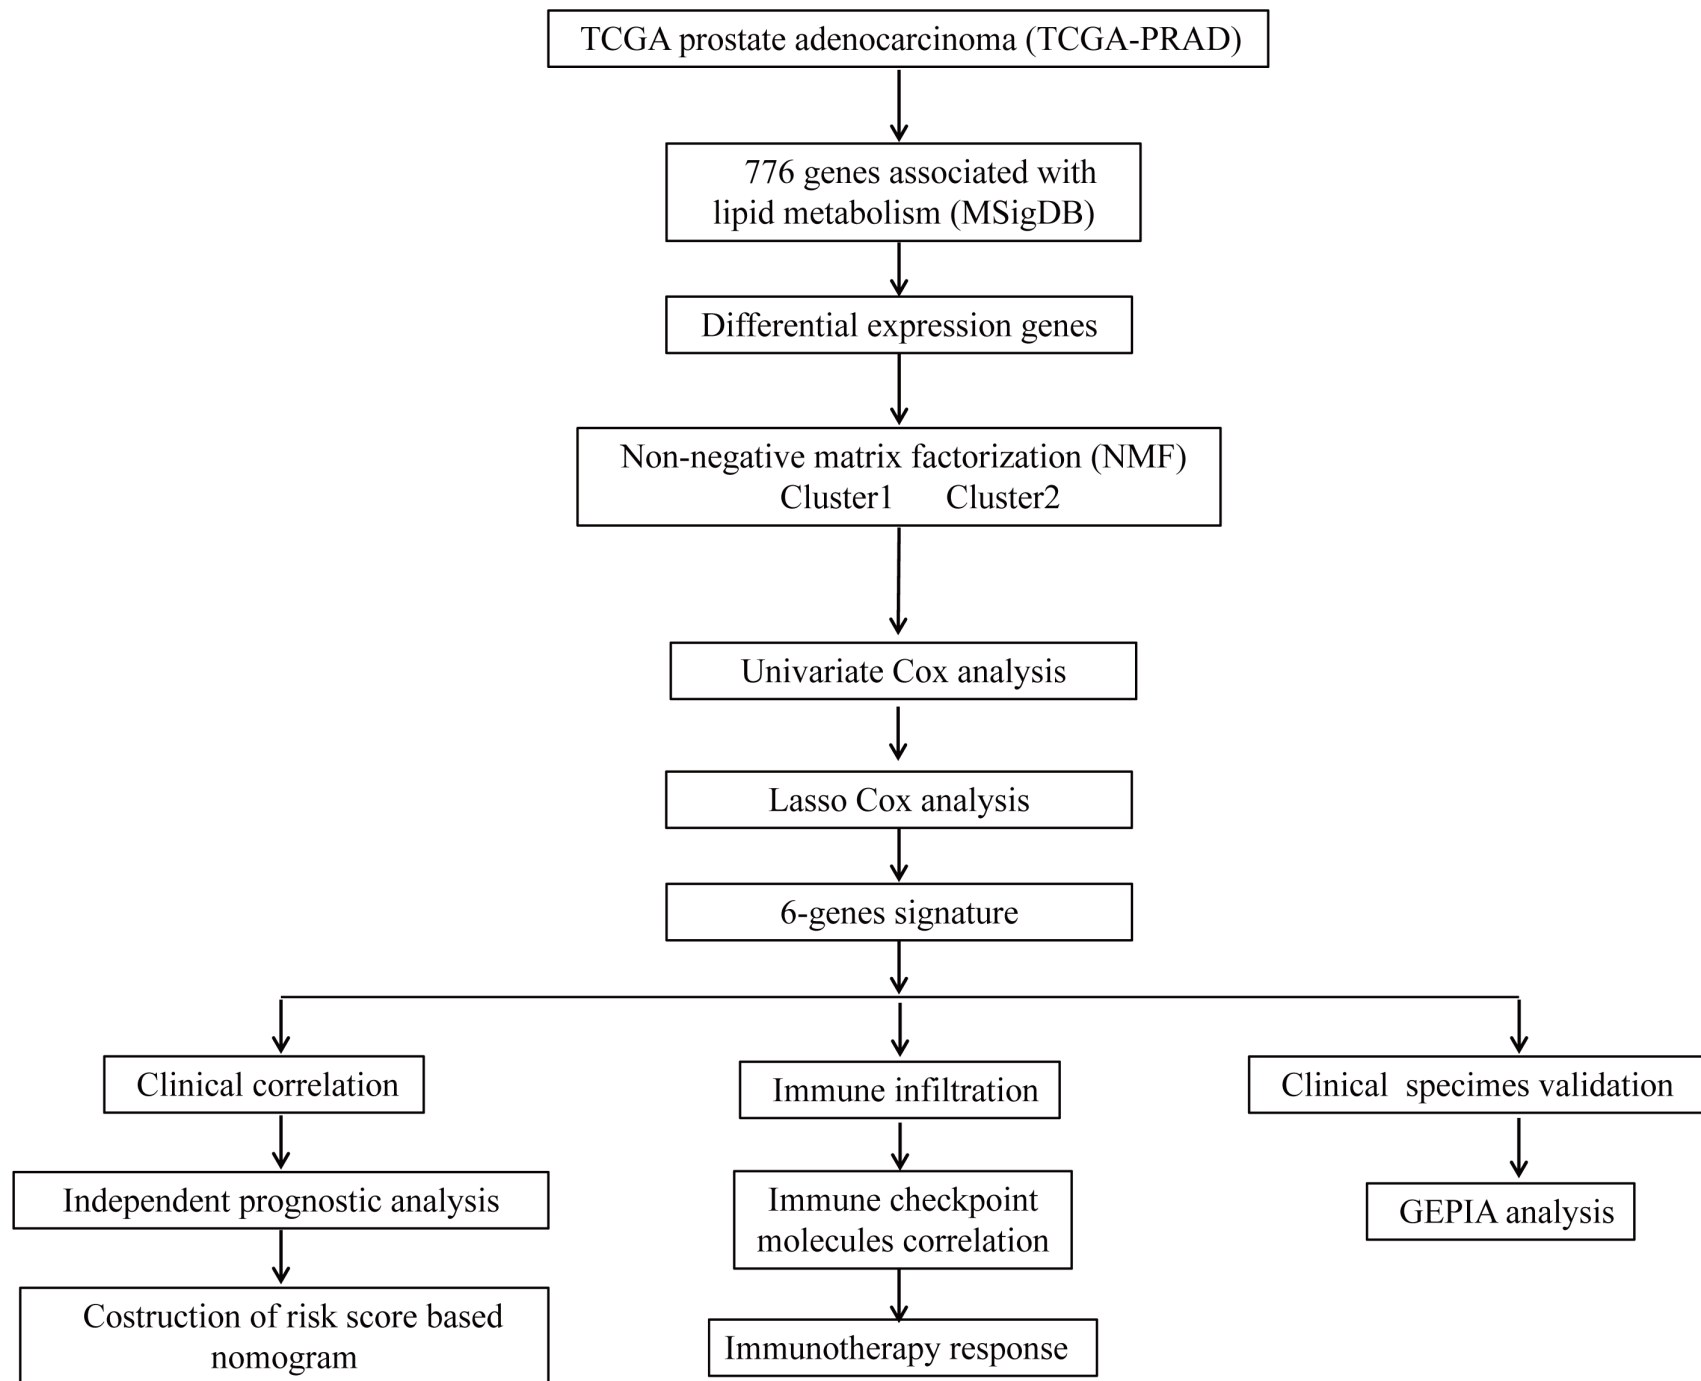

Supplement: f1 [file 8227806.f1.zip]
